# Supplementary material for: Morphological studies of self-assembled cyclotides extracted fromViola odorataas novel versatile platforms in biomedical applications
Source: Royal Society of Chemistry journal article supplement (doi:10.1039/d2bm00848c), 2022-01-01
Supplement: d2bm00848c1.pdf [file d2bm00848c1.pdf]

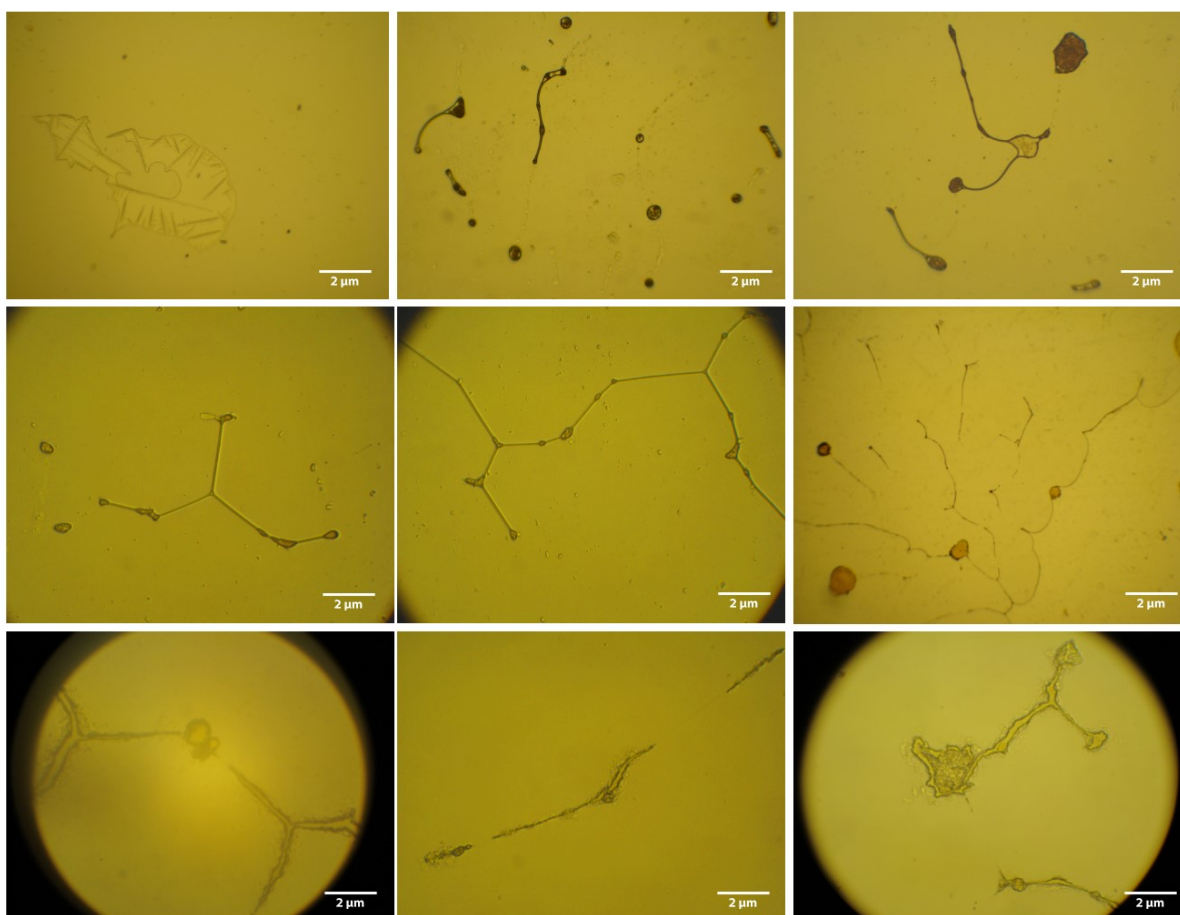

**Figure S1:** The interconnected aggregates and three fold junction node at pH 4, 37°C after 5 days taken by optical microscopy.

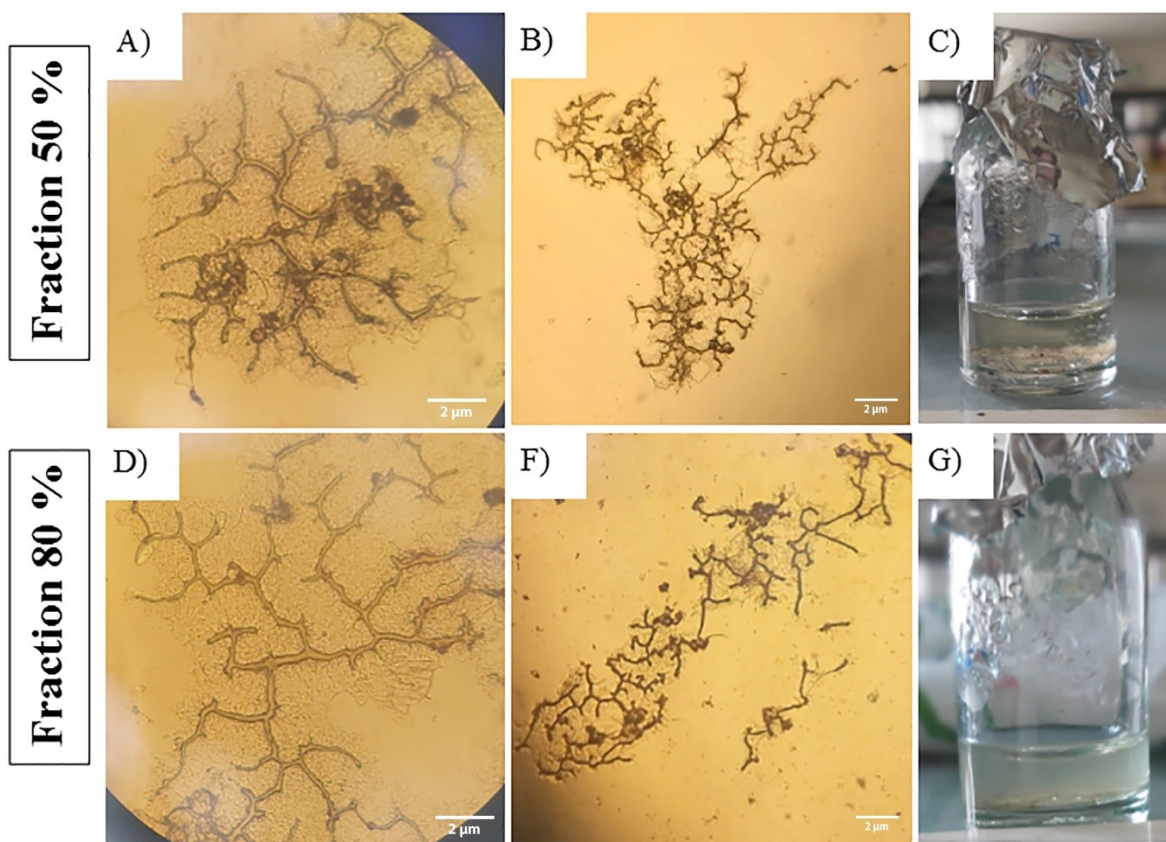

**Figure S2:** A, B, D, F) some of the architectures seen at pH 4, 37°C after 7 days reminiscent of dendritic structures C, G) the white precipitate seen after 7 days at pH 4, 37°C

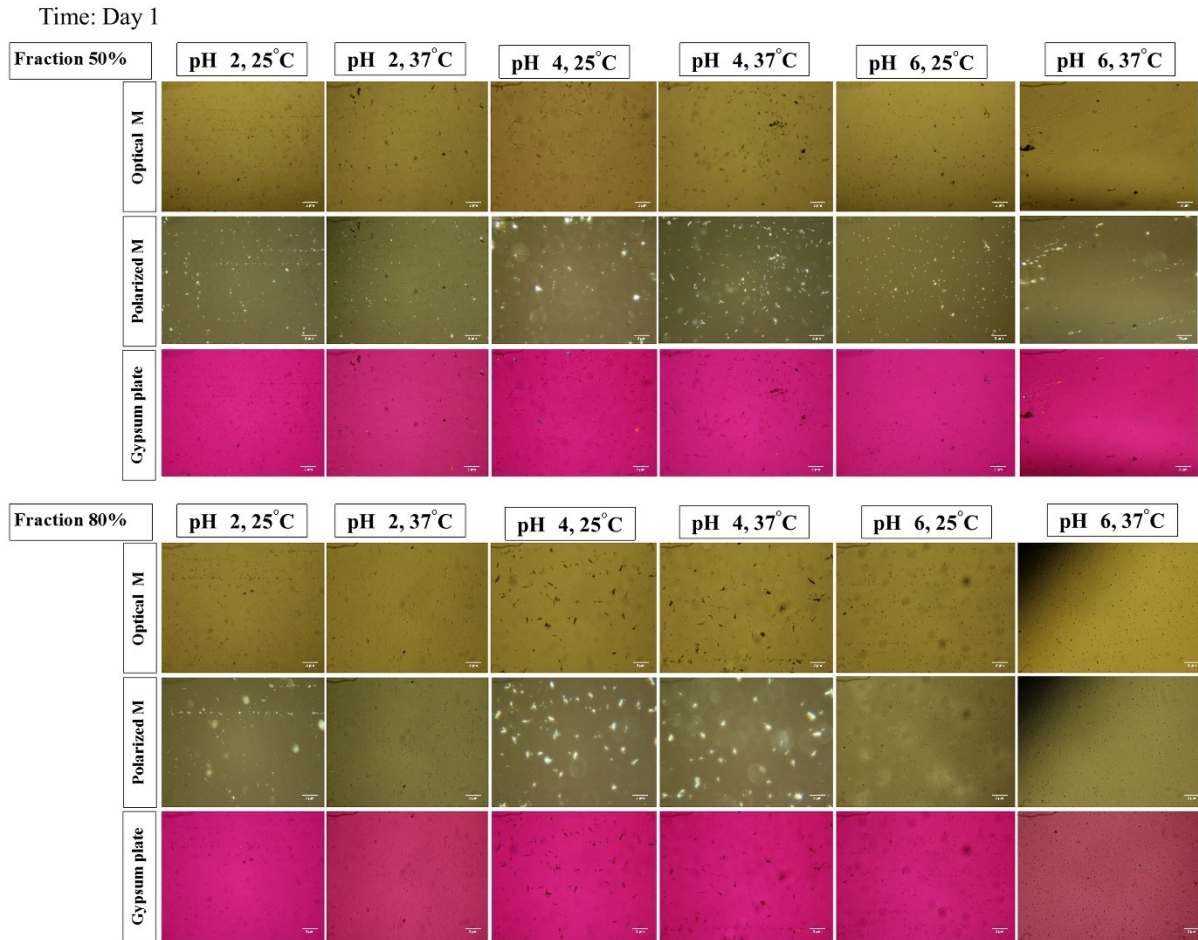

**Figure S3:** Optical and polarized microscopy (with or without gypsum plate) of self-assembled cyclotides during 1 day in different mediums

Time: Day 2

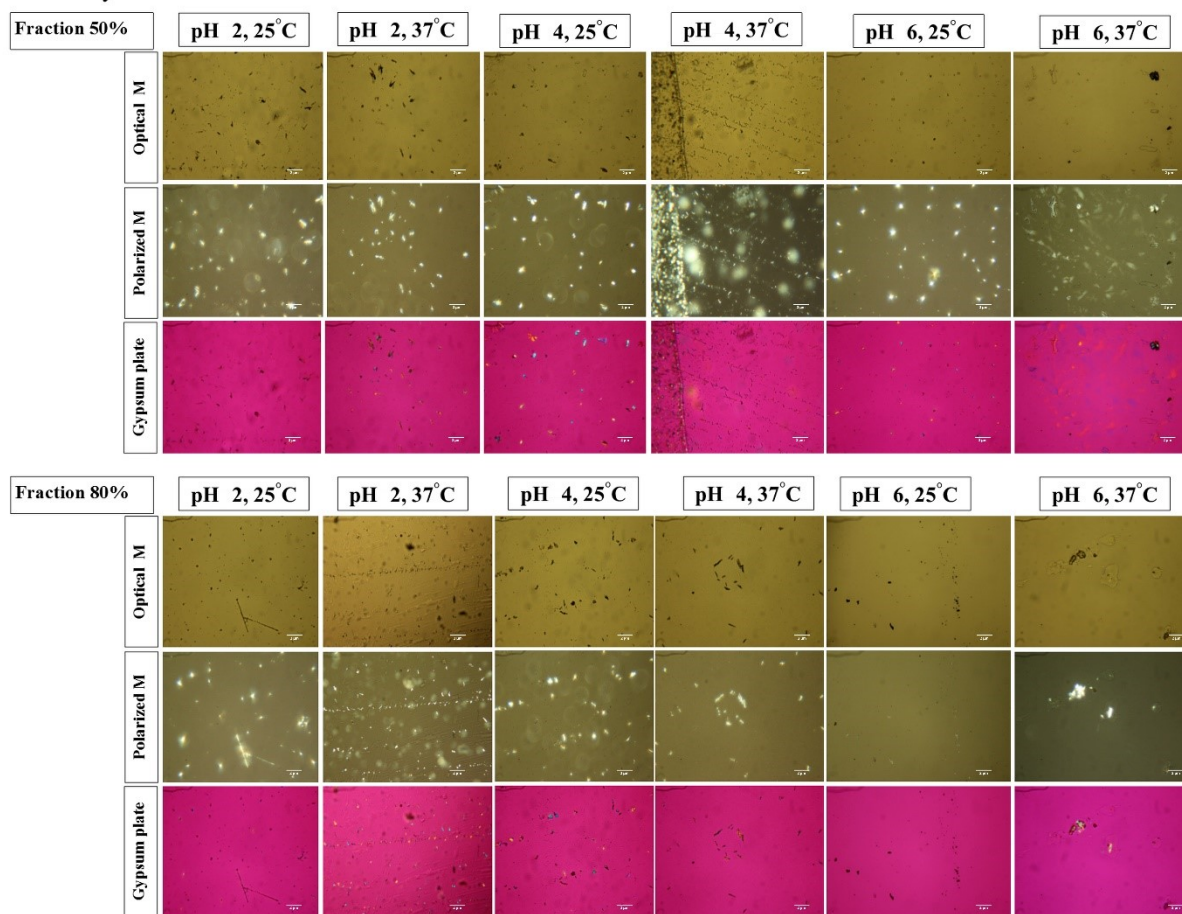

**Figure S4:** Optical and polarized microscopy (with or without gypsum plate) of self-assembled cyclotides during 2 days in different mediums

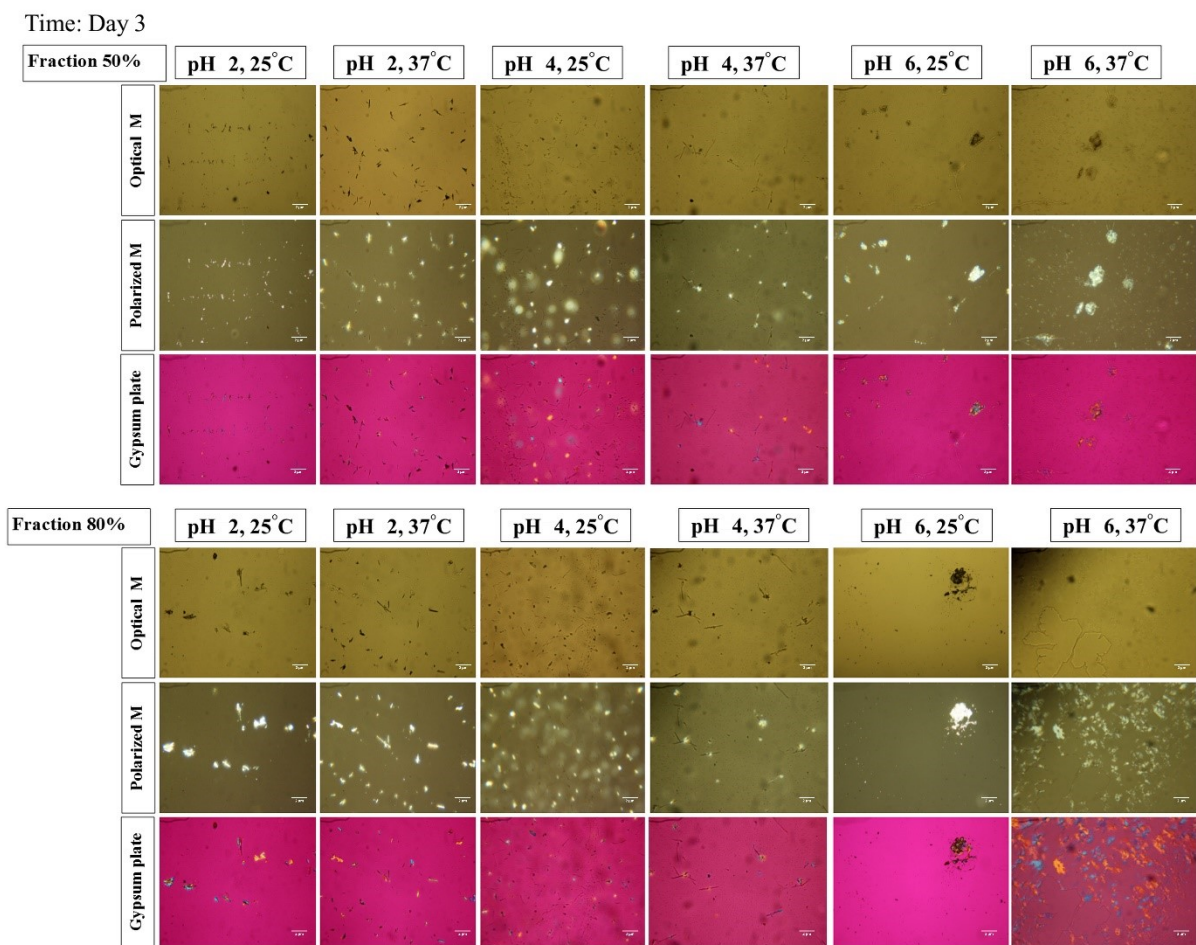

**Figure S5:** Optical and polarized microscopy (with or without gypsum plate) of self-assembled cyclotides during 3 days in different mediums

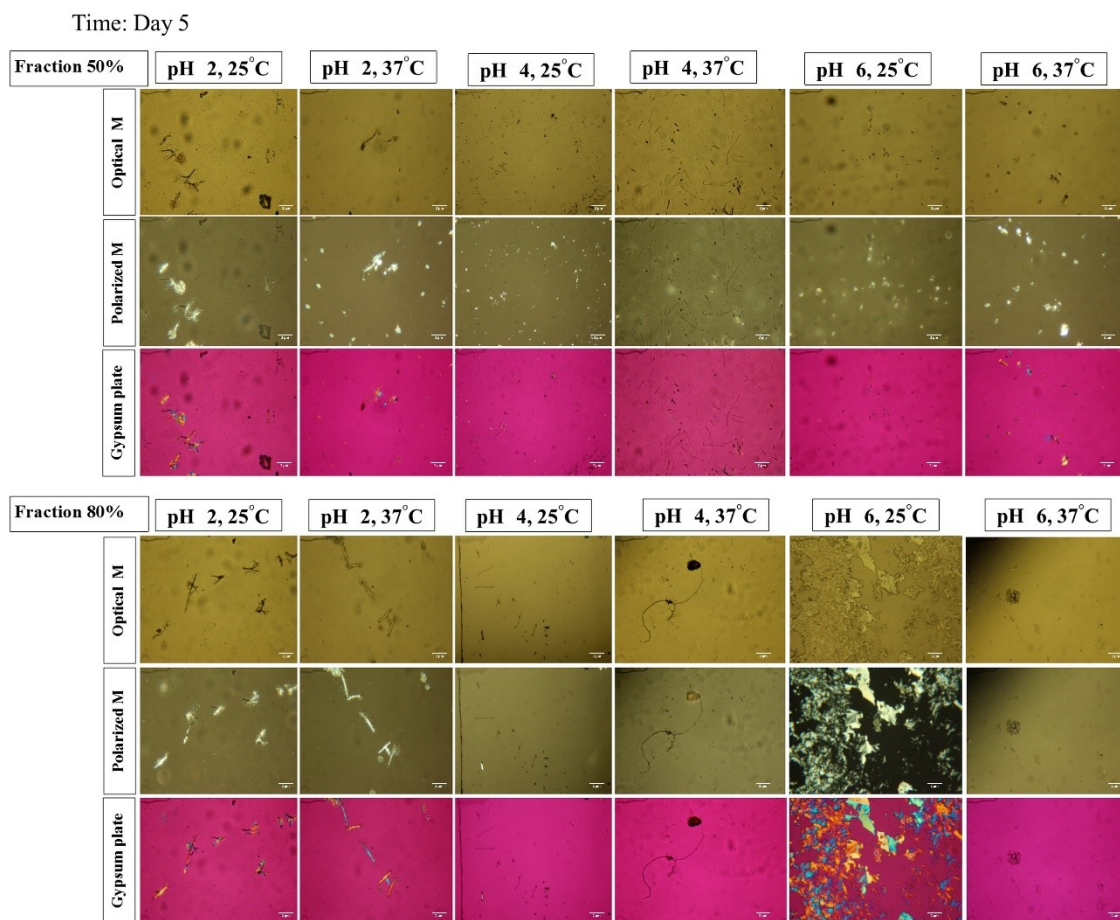

**Figure S6:** Optical and polarized microscopy (with or without gypsum plate) of self-assembled cyclotides during 5 days in different mediums

Time: Day 7

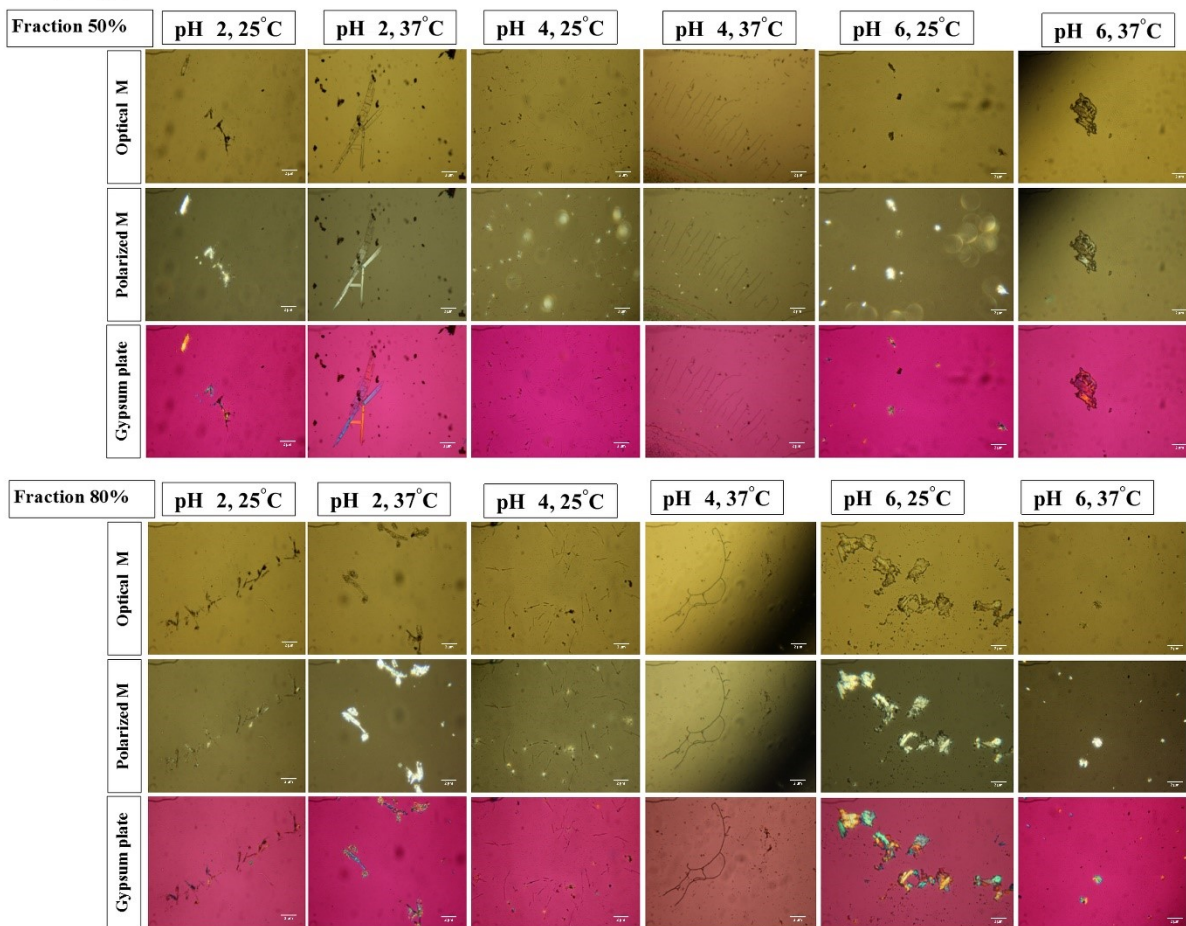

**Figure S7:** Optical and polarized microscopy (with or without gypsum plate) of self-assembled cyclotides during 7 days in different mediums

Time: Day 10

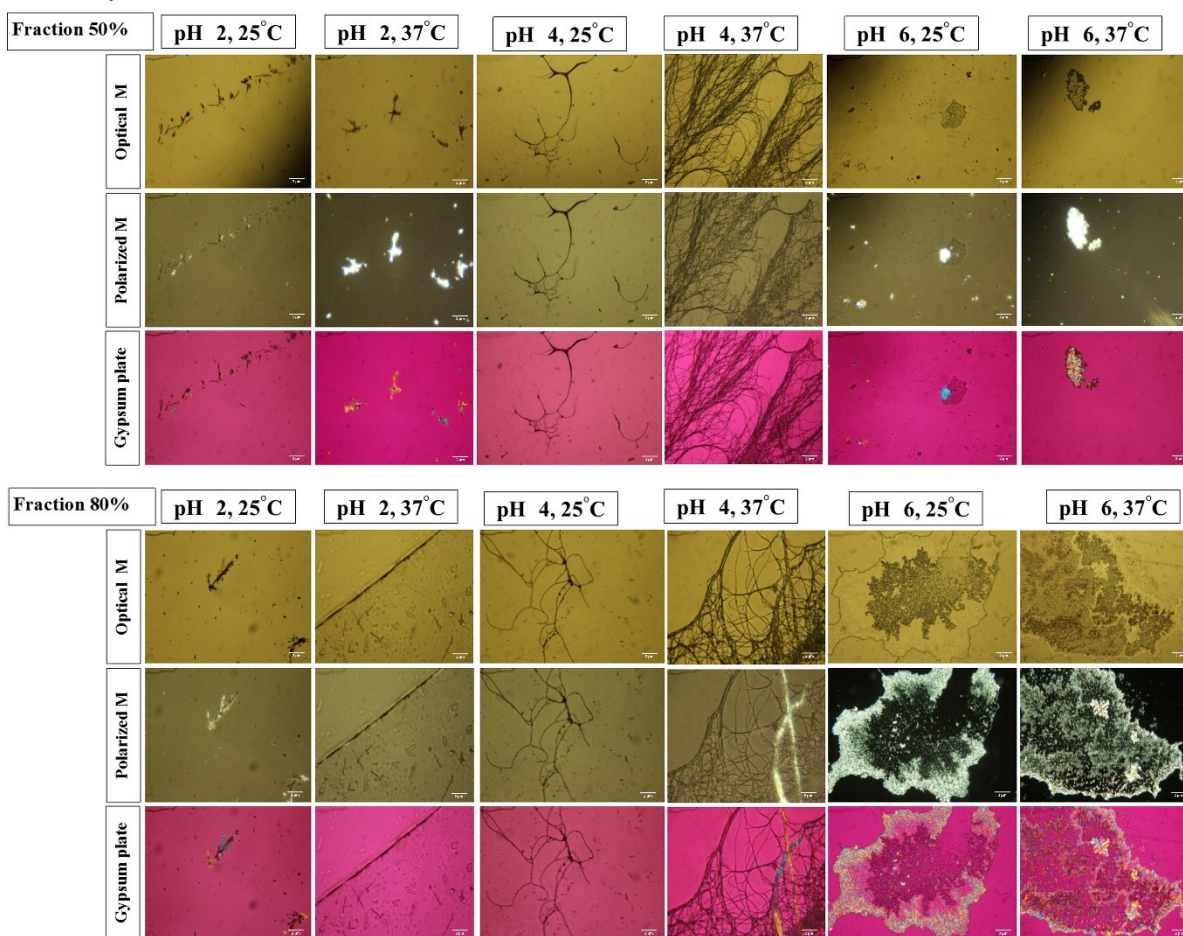

**Figure S8:** Optical and polarized microscopy (with or without gypsum plate) of self-assembled cyclotides during 10 days in different mediums

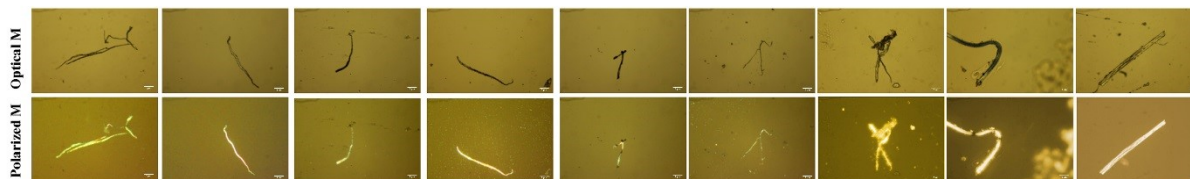

**Figure S9:** Nanotape or nanoribbon- like crystals seen at 37°C and pH 2 or 4 seen after 7 days.



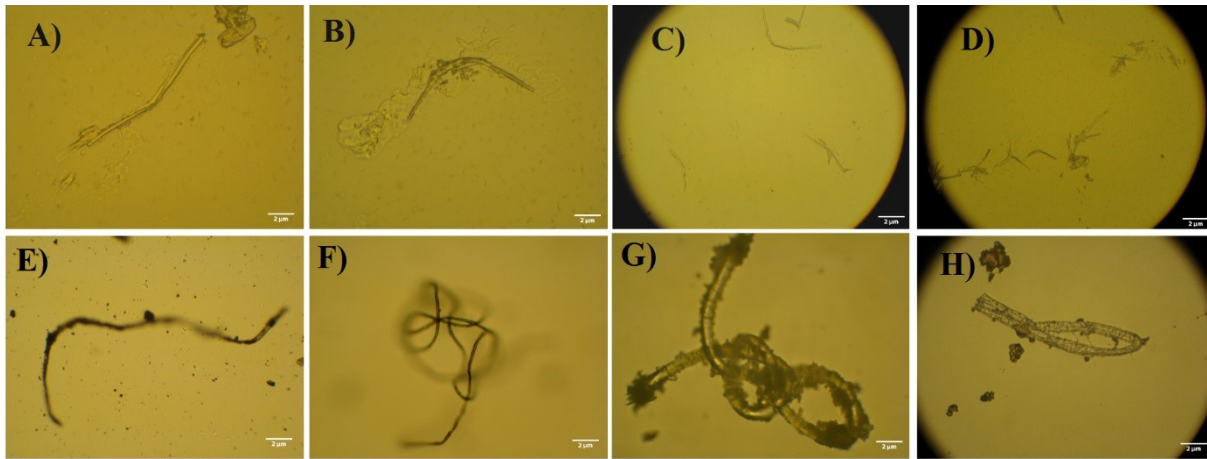

**Figure S10:** A, B, C, D) Banded nanotubes at pH 2 E,F) blurred images of nanofibers at pH 4 indicated that the structures do not appear only in planar orientations on the substrate but also on different orientations G, H) nanotapes or nanoribbon-like structures at 37°C after 7 days. These images might indicate that the final structures of the cyclotides are flexible

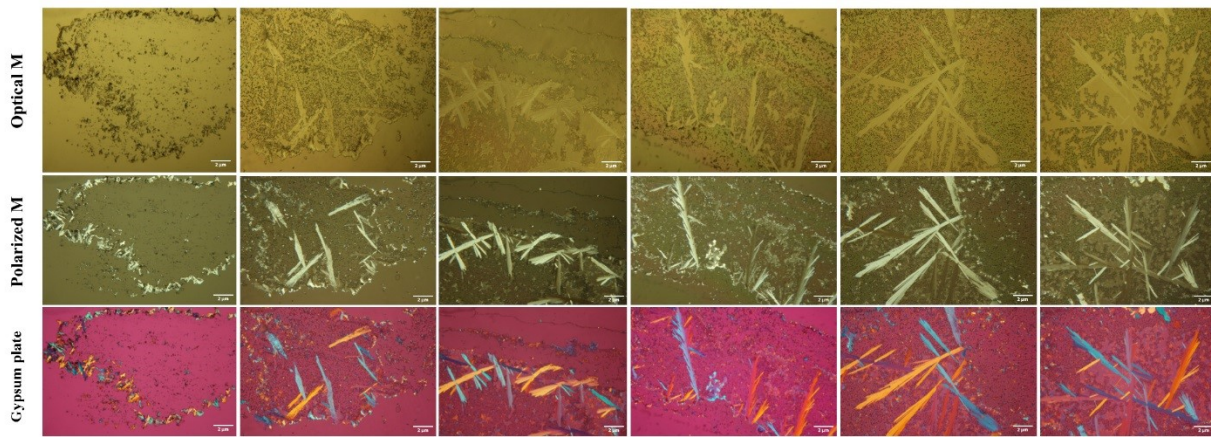

**Figure S11:** Stacked nanocrystal aggregates at pH 6, 37°C after 5 days

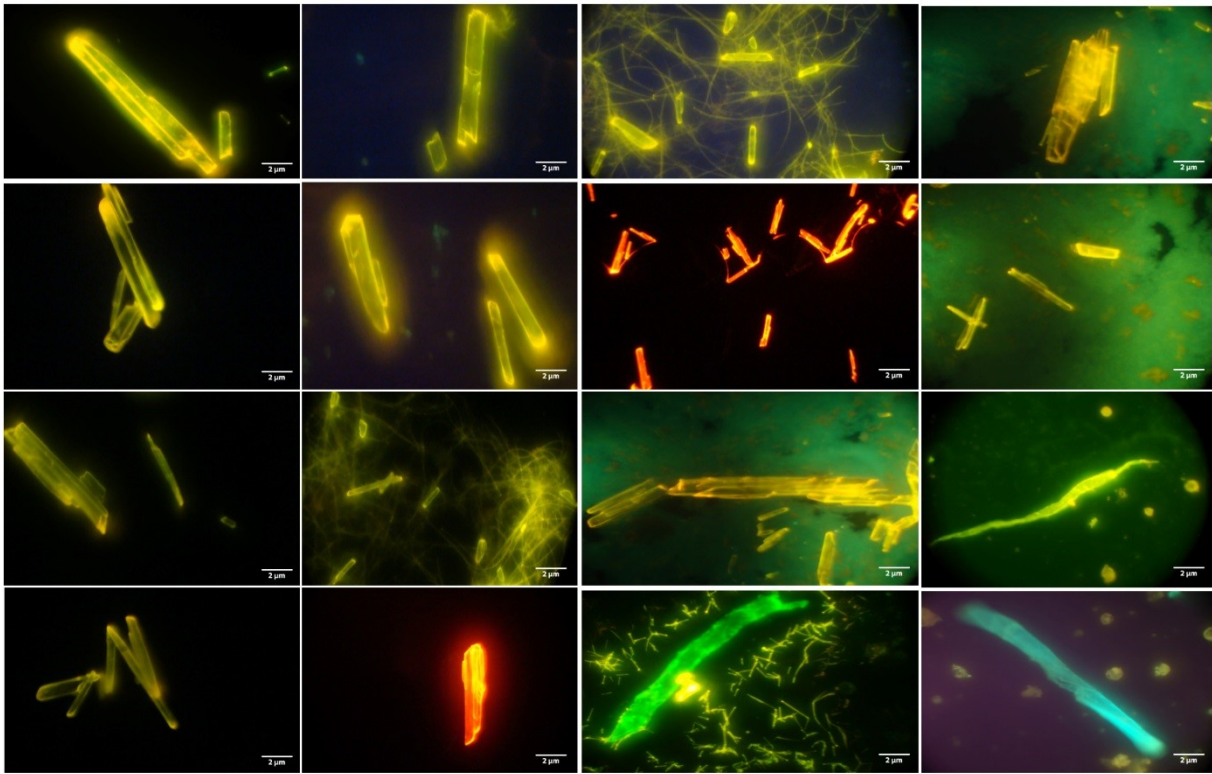

**Figure S12:** The crystalline structures seen at 37°C by fluorescence microscopy.

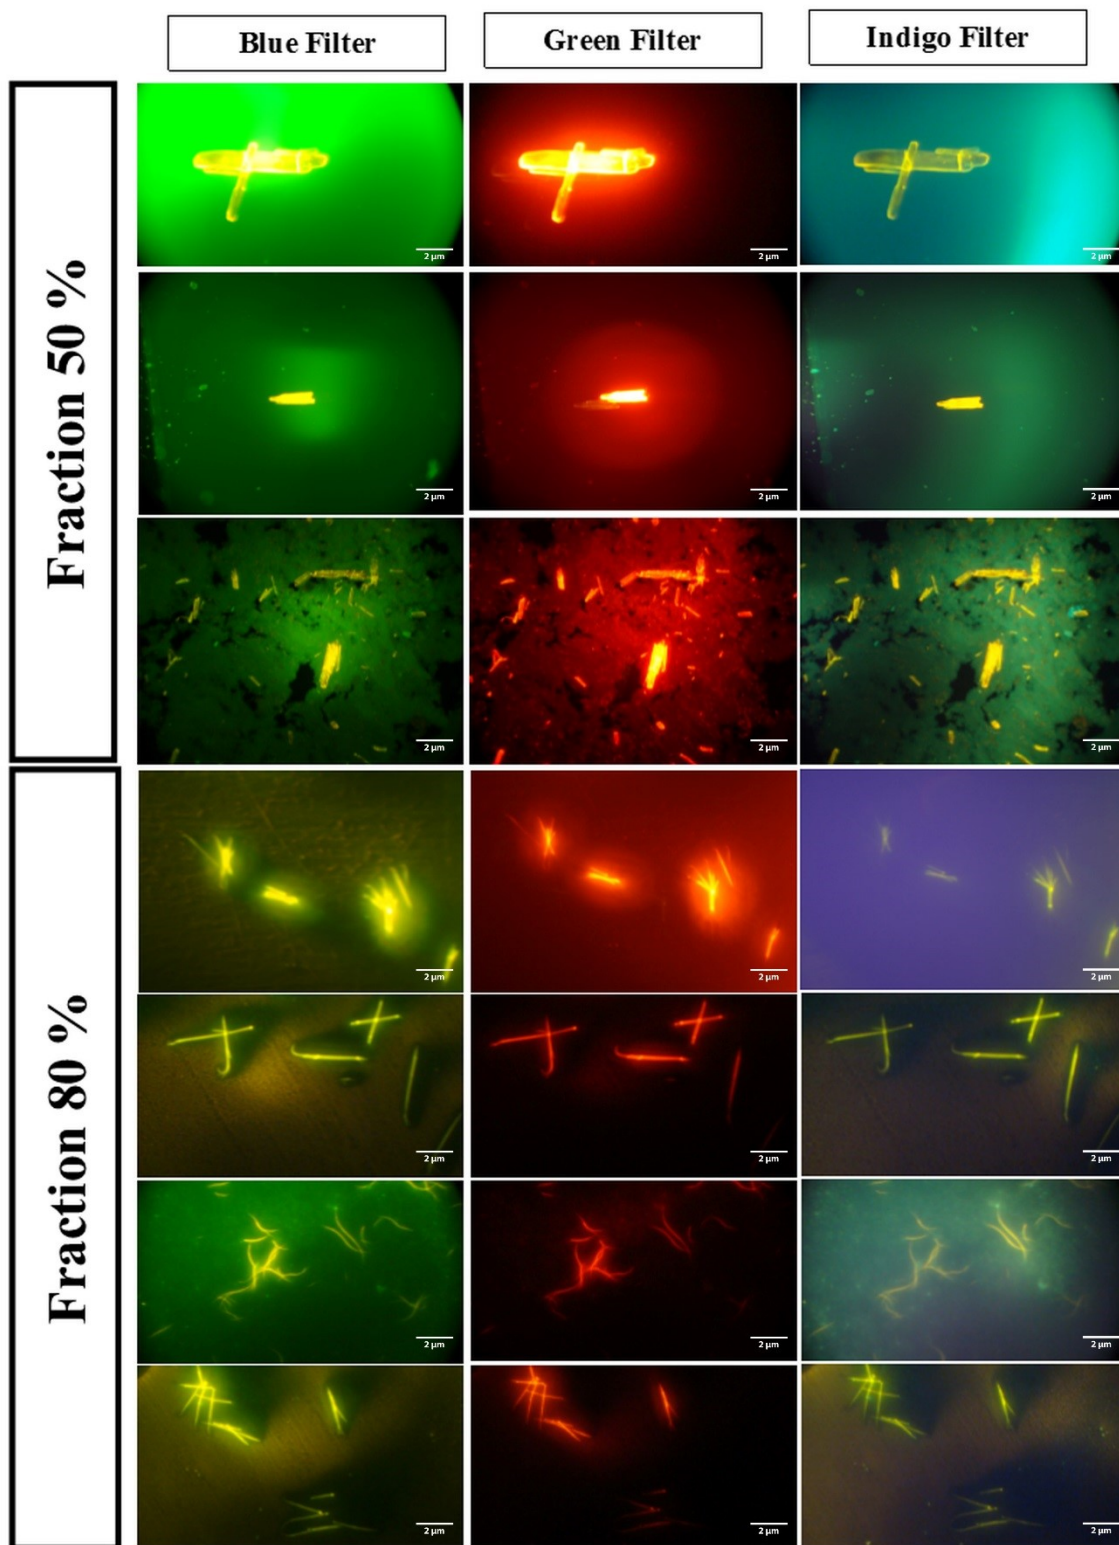

**Figure S13:** The visible luminescence of cyclotides by using blue, green and indigo filters by fluorescence microscopy.
